# Supplementary material for: Medical leadership: boon or barrier to organisational performance? A thematic synthesis of the literature
Source: PubMed Central journal article supplement — BMJ Open. 2020 Jul 21;10(7):e035542. doi: 10.1136/bmjopen-2019-035542 (PMC7375428; doi:10.1136/bmjopen-2019-035542), 2020-07-21
Supplement: bmjopen-2019-035542supp004.pdf [file bmjopen-2019-035542supp004.pdf]

Conditions affecting medical leadership

**APPENDIX 4 DETAILED OVERVIEW OF THE INCLUDED STUDIES (IN ORDER OF PUBLICATION DATE)**

| No | Reference                             | Study design                                                                  | Country         | Setting                       | Study participants                                                        |
|----|---------------------------------------|-------------------------------------------------------------------------------|-----------------|-------------------------------|---------------------------------------------------------------------------|
| 1. | Perreira, T., <i>et al.</i> (2019)    | Concept analysis using literature review                                      | N/A             | N/A                           | N/A                                                                       |
| 2. | Nieuwboer, M., <i>et al.</i> (2019)   | Systematic literature review                                                  | N/A             | N/A                           | N/A                                                                       |
| 3. | Boyle, T., <i>et al.</i> (2019)       | Semi-structured interviews (n=10)                                             | Canada          | Hospital                      | Senior health care executives                                             |
| 4. | Vazquez, C. (2019)                    | Semi-structured in-depth individual interviews (n=4)                          | USA             | Non-profit teaching hospitals | Physician leaders responsible for pediatric heart programs                |
| 5. | Keller, E., <i>et al.</i> (2019)      | Qualitative mixed methods: Semi-structured interviews (n=40) and observations | USA             | Academic hospital             | Physicians<br>Administrators                                              |
| 6. | Berghout, M., <i>et al.</i> (2019)    | Ethnographic study (n=23): Observations (100 hours)                           | The Netherlands | Hospital                      | Participants of a medical leadership development program (all physicians) |
| 7. | Van de Riet, M., <i>et al.</i> (2019) | Interview study (n=39)                                                        | The Netherlands | General district hospital     | Physicians<br>Nurses<br>Laboratory technicians<br>Managers                |
| 8. | Jorm, C., <i>et al.</i> (2019)        | Scoping study: Literature review, interviews (n>100), survey (n=1800)         | Australia       | Health system                 | Clinicians<br>Executives                                                  |

## Conditions affecting medical leadership

|     |                                                 |                                                                               |                 |                          |                                                                                                                                                                                                                |
|-----|-------------------------------------------------|-------------------------------------------------------------------------------|-----------------|--------------------------|----------------------------------------------------------------------------------------------------------------------------------------------------------------------------------------------------------------|
| 9.  | McHugh, S. <i>et al.</i> (2019)                 | Multiple case study (n=6): Documents, key stakeholder interviews (n=36)       | Ireland         | Health system            | Managers, patient advocates, doctors, nurses, private ambulance representatives, general practitioners, private hospital representatives, hospital campaigners, local media representatives, local politicians |
| 10. | Ahnfeldt-Mollerup, P., <i>et al.</i> (2018)     | Survey (n=352), registrar of quality reports                                  | Denmark         | Primary care             | General Practitioners                                                                                                                                                                                          |
| 11. | Kampstra, M., <i>et al.</i> (2018)              | Systematic literature review                                                  | N/A             | N/A                      | N/A                                                                                                                                                                                                            |
| 12. | Berghout, M., <i>et al.</i> (2018).             | Qualitative: observations and document analysis                               | The Netherlands | Health system            | Opinion-making physicians                                                                                                                                                                                      |
| 13. | Nzinga, J., McGivern, G., & English, M. (2018). | Case study: ethnographic observation (480 h), interviews, focus groups (n=61) | Kenya           | Hospital                 | Mid-level departmental leaders, nurses in charge of inpatient wards, senior managers, frontline workers                                                                                                        |
| 14. | Yanchus, N. J., <i>et al.</i> (2018).           | Qualitative survey comments                                                   | US              | Health system            | Physicians                                                                                                                                                                                                     |
| 15. | Berghout, M. A., <i>et al.</i> (2017).          | Literature review                                                             | N/A             | Hospital                 | Physicians in managerial or leadership roles                                                                                                                                                                   |
| 16. | Bharwani, A., <i>et al.</i> (2017).             | Interview study (n=77)                                                        | Canada          | Academic medicine system | Trainees, mid-level university leaders, senior medical clinical leaders, senior university leaders, medical scientists, senior                                                                                 |

## Conditions affecting medical leadership

|     |                                                         |                                                                                                      |            |              |                                             |
|-----|---------------------------------------------------------|------------------------------------------------------------------------------------------------------|------------|--------------|---------------------------------------------|
|     |                                                         |                                                                                                      |            |              | executives and directors                    |
| 17. | Canaway, R., <i>et al.</i> (2017).                      | Semi-structured interviews (n=17)                                                                    | Australia  | Hospital     | Senior management                           |
| 18. | Clay-Williams, R., <i>et al.</i> (2017).                | Literature review                                                                                    | N/A        | N/A          | Senior management                           |
| 19. | Dickinson, H. <i>et al.</i> (2017).                     | Case study: 9 cases, 150 interviews                                                                  | UK         | Hospital     | Doctors, nurses and managers                |
| 20. | Giri, P., Aylott, J., & Kilner, K. (2017).              | Quantitative: survey study (n=249)                                                                   | UK         | N/A          | Faculty of Occupational Medicine            |
| 21. | Ileri, S. K., <i>et al.</i> (2017).                     | Multi-method: 25 interviews, survey (n=292)                                                          | UK & Kenya | Hospital     | Middle and senior management                |
| 22. | Jones, L., <i>et al.</i> (2017).                        | Qualitative: interviews (n=65), observations (60 hours), document analysis                           | UK         | Hospital     | Senior management                           |
| 23. | Kerrissey, M., <i>et al.</i> (2017).                    | Case study: 16 clinics, 18 interviews                                                                | US         | Primary care | All staff, interviews with heads of clinics |
| 24. | Macinati, M. S., Cantaluppi, G., & Rizzo, M. G. (2017). | Multi-method study: literature review, performance data, unstructured interviews, questionnaire n=72 | Italy      | Hospital     | Physicians                                  |
| 25. | Spehar, I., <i>et al.</i> (2017).                       | Interview study: Focus group interviews with 17 GPs                                                  | Norway     | Primary care | Physicians                                  |
| 26. | Storkholm, M. <i>et al.</i> (2017).                     | Interview study (n=30)                                                                               | Denmark    | Hospital     | Staff and managers                          |

## Conditions affecting medical leadership

|     |                                                    |                                                                                                                                   |                            |               |                                                                                                                                                                                                                |
|-----|----------------------------------------------------|-----------------------------------------------------------------------------------------------------------------------------------|----------------------------|---------------|----------------------------------------------------------------------------------------------------------------------------------------------------------------------------------------------------------------|
| 27. | Waring, J., & Crompton, A. (2017).                 | Case study: non-participant observation's (90 hours), semi-structured interviews (n=34), focus groups (n=3) and document analysis | UK                         | Hospital      | Senior managers, senior medical and nursing leaders, quality and safety managers, senior human resources, communications and operations managers, nurses, doctors, departmental managers, and support workers. |
| 28. | Clark, K. D., <i>et al.</i> (2016).                | Case study: Observational cross-case comparative study (19 practices)                                                             | US                         | Primary care  | Staff and leaders at all levels                                                                                                                                                                                |
| 29. | Denis, J.-L., & van Gestel, N. (2016).             | Qualitative: Document analysis                                                                                                    | The Netherlands and Canada | Health system | N/A                                                                                                                                                                                                            |
| 30. | Kristensen, S., <i>et al.</i> (2016).              | Intervention study: A repeated cross-sectional experimental study, 2 surveys                                                      | Denmark                    | Hospital      | Staff and managers                                                                                                                                                                                             |
| 31. | Lega, F., & Sartirana, M. (2016).                  | Qualitative: literature review, action-research and field investigations                                                          | Italy                      | Hospital      | N/A                                                                                                                                                                                                            |
| 32. | Macinati, M. S., Bozzi, S., & Rizzo, M. G. (2016). | Multi-method: Literature review to develop hypothesis, performance data, unstructured interviews, questionnaire (n=65)            | Italy                      | Hospital      | First and middle managers                                                                                                                                                                                      |

## Conditions affecting medical leadership

|     |                                         |                                                                                                         |                               |                                                                          |                                                                        |
|-----|-----------------------------------------|---------------------------------------------------------------------------------------------------------|-------------------------------|--------------------------------------------------------------------------|------------------------------------------------------------------------|
| 33. | Macinati, M. S., & Rizzo, M. G. (2016). | Survey n=53                                                                                             | Italy                         | Hospital                                                                 | General manager, administrative officer, controller, clinical managers |
| 34. | Noordegraaf, M., <i>et al.</i> (2016).  | Qualitative: document analysis, observation, interviews (n=38)                                          | The Netherlands               | Hospital                                                                 | Residents and program directors                                        |
| 35. | Sarto, F., & Veronesi, G. (2016).       | Literature review                                                                                       | N/A                           | Hospital                                                                 | Senior management                                                      |
| 36. | Bresnen, M., <i>et al.</i> (2015).      | Qualitative: n=85 interviews with 68 respondents, 54 hours of observations                              | UK                            | Two hospitals and a trust providing mental health and community services | Medical, general, and functional managers.                             |
| 37. | Burgess, N., <i>et al.</i> (2015).      | Interview study (n=91)                                                                                  | UK                            | Hospital                                                                 | Middle managers                                                        |
| 38. | Martin, G., <i>et al.</i> (2015).       | Interview study: 56 focus group interviews, 46 individual interviews, 25 in-depth individual interviews | UK                            | Primary and secondary care                                               | Staff and managers                                                     |
| 39. | Mascia, D., <i>et al.</i> (2015).       | Survey, n=791                                                                                           | Italy                         | Hospital                                                                 | Physicians                                                             |
| 40. | Quinn, J. F. (2015).                    | Survey, (n=677)                                                                                         | US                            | N/A                                                                      | Senior managers                                                        |
| 41. | Spurgeon, P., <i>et al.</i> (2015).     | Survey, UK 30 trusts, Australia and New Zealand 4 sites                                                 | UK, Australia and New Zealand | Hospital                                                                 | All staff                                                              |
| 42. | Tsai, T. C., <i>et al.</i> (2015).      | Survey (n=722 in the US, n=132 in the UK)                                                               | UK & US                       | Hospital                                                                 | First line and senior managers                                         |

## Conditions affecting medical leadership

|     |                                                       |                                                                     |           |               |                                                                                       |
|-----|-------------------------------------------------------|---------------------------------------------------------------------|-----------|---------------|---------------------------------------------------------------------------------------|
| 43. | Damschroder, L. J., <i>et al.</i> (2014).             | Interview study (n=62)                                              | US        | Hospital      | Network-level and facility-level executives, managers, front-line providers and staff |
| 44. | Macinati, M. S., & Rizzo, M. G. (2014). <i>et al.</i> | Questionnaire (n=70)                                                | Italy     | Hospital      | First and middle managers                                                             |
| 45. | Moffatt, F., Martin, P., & Timmons, S. (2014).        | Qualitative: Document analysis                                      | UK        | Health system | N/A                                                                                   |
| 46. | Nelson, M. F., <i>et al.</i> (2014)                   | Intervention study                                                  | US        | Hospital      | Physicians, nurse managers, administration, and board members                         |
| 47. | Nicol, E. D., Mohanna, K., & Cowpe, J. (2014).        | Interview study (n=20)                                              | UK        | Health system | Senior management                                                                     |
| 48. | Lega, F., Prenestini, A., & Spurgeon, P. (2013).      | Literature review                                                   | N/A       | N/A           | N/A                                                                                   |
| 49. | Fulop, L. (2012).                                     | Interview study (n=31)                                              | Australia | Hospital      | Clinical managers                                                                     |
| 50. | Howard, J., <i>et al.</i> (2012).                     | Case study: observation notes, meeting recordings, interviews (n=8) | US        | Primary care  | Physician leaders                                                                     |
| 51. | Mallon, W. T., & Buckley, P. F. (2012).               | Literature review                                                   | N/A       | Hospital      | Senior management                                                                     |
| 52. | Numerato, D., Salvatore, D., & Fattore, G. (2012).    | Literature review                                                   | N/A       | N/A           | N/A                                                                                   |
| 53. | Spehar, I., Frich, J. C., &                           | Qualitative: In-depth interviews (n=30) and                         | Norway    | Hospital      | First line and middle managers                                                        |

## Conditions affecting medical leadership

|     |                                                           |                                                                                  |        |                             |                                                             |
|-----|-----------------------------------------------------------|----------------------------------------------------------------------------------|--------|-----------------------------|-------------------------------------------------------------|
|     | Kjekshus, L. E. (2012).                                   | participant observations (n=20)                                                  |        |                             |                                                             |
| 54. | Choi, S., <i>et al.</i> (2011).                           | Single case study: 22 interviews, 22 hours of observations and document analysis | Sweden | Hospital                    | Senior management                                           |
| 55. | Ham, C., <i>et al.</i> (2011).                            | Interview study (n=20)                                                           | UK     | Health system               | Senior management                                           |
| 56. | Lin, B. Y.-J., <i>et al.</i> (2011).                      | Survey (n=448)                                                                   | Taiwan | Hospital                    | Staff and middle managers                                   |
| 57. | Snell, A. J., Briscoe, D., & Dickson, G. (2011).          | Interviews (n=51)                                                                | Canada | N/A                         | Physicians who have attended leadership development courses |
| 58. | Spurgeon, P., Mazelan, P. M., & Barwell, F. (2011).       | Survey: (n=30 secondary care trusts)                                             | UK     | Secondary care trusts       | Physicians                                                  |
| 59. | Albert, K., Sherman, B., & Backus, B. (2010).             | Intervention study                                                               | US     | Hospital                    | First line and middle managers                              |
| 60. | Hayes, C., <i>et al.</i> (2010).                          | Case study of four quality leaders                                               | Canada | Hospital                    | Middle managers                                             |
| 61. | von Knorring, M., de Rijk, A., & Alexanderson, K. (2010). | Interview study (n=18)                                                           | Sweden | Health system               | Senior management                                           |
| 62. | Jiang, H. J., <i>et al.</i> (2009).                       | Quantitative (n=562)                                                             | US     | Hospitals and health system | Senior management                                           |
| 63. | Johansen, M. S., & Gjerberg, E. (2009).                   | Multi-method (interviews 44; survey 166)                                         | Norway | Hospital                    | Managers from different levels                              |

## Conditions affecting medical leadership

|     |                                       |                                                                          |           |               |                                                                                                                                                                       |
|-----|---------------------------------------|--------------------------------------------------------------------------|-----------|---------------|-----------------------------------------------------------------------------------------------------------------------------------------------------------------------|
| 64. | Waring, J., & Currie, G. (2009).      | Case study (observations 200hrs, semi-structured interviews n=43)        | UK        | Hospital      | Hospital managers, senior physician leaders, nursing director, senior physicians, staff                                                                               |
| 65. | Epstein, A. L., & Bard, M. A. (2008). | Interview study (n=68)                                                   | US        | Hospital      | Middle managers                                                                                                                                                       |
| 66. | Ham, Chris, & Dickinson, H. (2008).   | Literature review                                                        | N/A       | N/A           | N/A                                                                                                                                                                   |
| 67. | Lega, F. (2008).                      | Qualitative: Literature review, action-research and field investigations | Italy     | Health system | N/A                                                                                                                                                                   |
| 68. | McAlearney, A. S. (2008).             | Interview study (n=200)                                                  | US        | Health system | Hospital and health system managers and executives, academic experts, consultants, association reps, vendors of leadership development programs, program participants |
| 69. | Menaker, R., & Bahn, R. S. (2008).    | Survey (n=314)                                                           | US        | Hospital      | Physicians and senior managers                                                                                                                                        |
| 70. | Shipton, H., <i>et al.</i> (2008).    | Survey (n=17 949)                                                        | UK        | Hospital      | Staff                                                                                                                                                                 |
| 71. | Sorensen, R., & Iedema, R. (2008).    | Ethnographic study: observation, interviews, focus groups (n=89)         | Australia | Hospital      | Medical managers, physicians, nursing managers, nurses, patients, other external palliative care specialists                                                          |



## Conditions affecting medical leadership

|     |                       |                                                                   |    |           |                                                                                         |
|-----|-----------------------|-------------------------------------------------------------------|----|-----------|-----------------------------------------------------------------------------------------|
| 72. | Waring, J. (2007).    | Case study (observations 200hrs, semi-structured interviews n=43) | UK | Hospital  | Hospital managers, senior physician leaders, nursing director, senior physicians, staff |
| 73. | Prybil, L. D. (2006). | Quantitative (14 hospitals)                                       | US | Hospitals | N/A                                                                                     |
